## **Title: Driving Me Crazy: The effects of stress on the driving abilities of paramedic students.**

### **Authors**

- Trevor Hines Duncliffe MA BA (Hons.)<sup>1</sup>
  - Brittany D'Angelo BHSc (Hons.)<sup>1</sup>
  - Michael Brock BSc (Hons.)<sup>1</sup>
  - Cal Fraser<sup>1</sup>
  - Jake Lamarra<sup>1</sup>
  - Nick Austin<sup>1</sup>
  - Matt Pusateri<sup>1</sup>
  - Alan M. Batt MSc PhD(c)<sup>1,2,3</sup> [abatt@fanshawec.ca](mailto:abatt@fanshawec.ca)
1. Fanshawe College, London, Ontario, Canada.
  2. Paramedic Science Discipline, CQUniversity, Queensland, Australia
  3. Department of Community Emergency Health and Paramedic Practice, Monash University, Victoria, Australia.

### **Author for correspondence:**

Alan M. Batt, Paramedic Programs, Fanshawe College, 1001 Fanshawe College Blvd, London, ON N5Y5R6, Canada. Email: [abatt@fanshawec.ca](mailto:abatt@fanshawec.ca)

### **Competing Interests**

This work was not supported or funded by any drug company.

### **Author Declarations**

The authors declare that this work has not been published elsewhere. Data from this study were presented in oral presentations at the Australian and New Zealand College of Paramedicine Scientific Symposium in July 2018 in Melbourne, Australia, and at the Irish College of Paramedics Scientific Symposium in September 2018 in Cork, Ireland.

### **Funding & Support**

No external funding received.

### **Author Contributions**

THD, BA, MB, CF, JL, NA and MP conducted the literature review, designed and conducted the study, performed data analysis, and authored the manuscript. AB supervised the research project, assisted with data analysis, and authored and edited the manuscript. All authors contributed to the final writing and editing of the manuscript. All authors have approved the final version for publication.

## **Driving Me Crazy: The effects of stress on the driving abilities of paramedic students: a pilot study**

### **Background**

Previous research has demonstrated that stress has a negative impact on the performance of paramedics. Stress negatively impact the driving abilities of the general population, increasing the number of driving errors performed. No studies have explored stress and its link with the driving abilities of paramedics.

### **Methods**

Paramedic students underwent emergency driving assessment in a driving simulator before and after exposure to a stressful medical scenario. Number and type of errors were documented before and after by both driving simulator software and observation by two observers from the research team. The NASA Task Load Index (TLX) was utilised to record self-reported stress levels.

### **Results**

36 students participated in the study. Following exposure to a stressful medical scenario, paramedic students demonstrated no increase in overall error rate, but demonstrated an increase in three critical driving errors, namely failure to wear a seatbelt (3 baseline v 10 post stress), failing to stop for red lights or stop signs (7 v 35), and losing control of the vehicle (2 v 11). Self-reported stress levels also increased after the clinical scenario, particularly in the area of mental demand.

### **Conclusion**

Paramedics are routinely exposed to acute stress and this stress could increase the number of critical driving errors that occur. These results stimulate the need for further research, and highlight the potential need for increased driver training and stress management education in order to mitigate the frequency and severity of driving errors.

## **Key points**

- Paramedics are exposed to stressful clinical scenarios during the course of their work
- Many critical and serious clinical calls require patient transport to hospital
- Ambulance crashes occur regularly and pose a significant risk to the safety and wellbeing of both patients and paramedics
- This simulated clinical scenario followed by a simulated driving scenario has highlighted that stress appears to affect driving abilities in paramedic students
- The findings of this study, although conducted in paramedic students in simulated environments, highlight the need to further investigate the effects of stress on driving abilities among paramedics

## **Keywords**

Stress; driving; safety; paramedic; ambulance

## **Reflective questions**

- Have you felt the effects of stress after a clinical scenario?
- Have you ever felt stressed when driving an emergency vehicle to or from a clinical incident?
- What strategies could you consider to reduce the effects of stress on your own driving abilities?

## Introduction

The National Highway Traffic Safety Administration (NHTSA) in the USA has previously reported that an annual average of 4,500 motor vehicle collisions involved an ambulance, with almost 60% of these during the course of emergency driving. Of these, 34% resulted in injury, with an average of 33 fatalities and 2,600 injuries annually (National Highway Traffic Safety Administration, 2011a, 2011b; Smith, 2015). Figures for Canada are elusive, highlighting a lack of easily accessible national figures. However, Alberta emergency vehicles are involved in approximately 300 collisions per annum (Yasmin et al., 2014), while approximately 400 collisions occur per annum in B.C (Tyakoff et al., 2014). UK figures are as elusive as Canadian figures; however, a search of the grey literature and news websites has indicated that the Welsh Ambulance Service experienced 735 emergency vehicle crashes between April 2011 and March 2016, with 150 occurring while on emergency calls (BBC, 2011). Between April 2009 and August 2014, 148 ambulance collisions occurred in Berkshire, 310 in Hampshire, and 240 across Oxfordshire and Buckinghamshire (BBC, 2014), while 81 ambulances in the West Midlands crashed between 2012 and 2014 (Lumb, 2015). It should be noted that these figures are highly dependent on the definition of “collision” used by each agency, which is often unclear, or unreported. As can be seen from the sources that can be accessed, ambulances and paramedics operating them are not immune to vehicle collisions.

The majority of ambulance collisions appear to occur while driving under emergency driving conditions with lights and sirens on during emergency calls (Murray and Kue, 2017), although it is unclear whether these collisions are predominantly the fault of the driver of the ambulance, or the drivers of other vehicles involved in the collisions (Kahn et al., 2001; Saunders, 1994). In the United States more than twice the number of collisions occurred during the transport of a patient phase while using lights and sirens compared to no lights and siren use during transport. The authors estimated that when lights and sirens are used it would account for an “*approximately 1 additional crash per 10,000 transports*” (Watanabe et al., 2019). Given the volume of these events, it seems prudent to investigate some of the potentially contributory factors in these collisions.

Stressors such as adverse road conditions, other drivers, personality type, time constraints, and occupational stress have previously been linked to an increase in critical driving errors (Cartwright et al., 1996; Cœugnet et al., 2013). Stressors in other domains of life unrelated to driving, such as work stress, daily hassles, and mental health issues can also adversely affect driving errors, concentration, and traffic violations (Rowden et al., 2011). There is however, a lack of research on the impact of stress on the driving performance of paramedics. Paramedics often work in inherently stressful environments. Sources of stress in clinical practice include high acuity patients that decompensate quickly, performance of highly-intensity procedures, working while fatigued, a lack of personal time, and a disruption of social support (LeBlanc, 2009). Tasks that divide attention and require a person to combine multiple sources of information while under stress can lead to a reduction in performance of the person performing the task. In addition, stress has been determined to have a hindering effect on working memory, that is, the memory used to keep track of multiple stimuli and or multiple sources of information at one time (LeBlanc, 2009). The connection between high stress levels and the number of critical errors paramedics make while performing procedural medical skills was previously examined by LeBlanc and colleagues who discovered that “*paramedics overall performance, communication skills, ability to recall accurate*

*information, and provide adequate ventilations all suffered after engaging in high stress scenarios” (LeBlanc et al., 2012).*

LeBlanc et al., (2005, 2009) also reported that the current literature on stress and performance is ambiguous and conflicting; some studies demonstrate no impact or even improvement of task performance, while other studies have demonstrated a negative impact on performance while stressed. Improvement of performance is thought to be influenced by selective attention under stress, allowing for more focus on the stressful situation which is causing the stress and filtering out other non-related stimuli. Other literature has found that while under stress there is a lack of attentional resources, which decreases our ability to filter out irrelevant stimuli such as loud noises, leads to an increase in distractibility and therefore a shift in focus away from the relevant stimuli (LeBlanc., 2009).

Research also suggests that more experienced paramedics (the population in most of these studies) are not unaffected by stress but rather have developed more effective coping strategies to deal with stress (LeBlanc et al., 2012, 2005). It was observed that the performance of advanced care paramedics decreased during high-stress scenarios as well as their ability to accurately recall information about the scenarios, reporting information that had not occurred on reports following the high stress scenario (LeBlanc et al., 2012). It was also observed that the level of training and work experience in paramedics does not appear to prevent higher levels of anxiety and paramedics of all grades demonstrated a decreased ability to calculate drug dosages following a stressful scenario (LeBlanc et al., 2005). This suggests that less experienced paramedics, including paramedic students and recent graduates, may be more susceptible to performing critical errors under stress than their more experienced counterparts as they have not yet developed these more effective coping strategies. However, both experienced and non-experienced paramedics performance can be impacted by high levels of stress. In addition, those with less experience and perhaps education could benefit from additional ambulance operations training, in an attempt to reduce the number of ambulance collisions (Whiting et al., 1998).

This study aimed to examine the effects of stress on the number of critical driving errors made by paramedic students. We hypothesized that paramedic students would demonstrate riskier driving resulting in increased critical errors after experiencing a high-stress clinical scenario.

## **Methods and materials**

### *Participants*

Participants were recruited from a convenience sample of first and second year paramedic students at [redacted for peer review], Ontario, Canada. All participants had a minimum of a valid G class licence (car licence) and knowledge of the Ontario Traffic Act and Ambulance Act. Participants were excluded from this study if they did not meet the above criteria.

### *Ethics and consent*

Ethical approval was received from [redacted for peer review] Research Ethics Board (protocol S 17-10-02-1). Participation was voluntary and all data were anonymized

immediately following the simulation to maintain confidentiality. Participants were informed that they could withdraw their consent at any stage of the process prior to anonymization.

### *Setting*

This study was conducted in the province of Ontario, Canada. Paramedics in Ontario are generally staffed two per ambulance or solo response on a response vehicle. When they are double-crewed, they share both driving and patient care duties. The Highway Traffic Act (HTA) in Ontario provides for four primary exemptions (although there are more) for drivers of emergency vehicles.

1. Emergency vehicle drivers can proceed through a red light, after making a full stop and ensuring all traffic has stopped for them.
2. Emergency vehicle drivers are allowed to pass a streetcar on the left, because streetcars cannot pull over to the right.
3. Fire trucks are permitted to drive in the far left lane of the Don Valley Parkway, Gardiner Expressway and the 400 Series Highways
4. Emergency vehicle drivers can exceed the speed limit, as long as the lights and siren are activated.

(Ontario Ministry of Transport, Highway Traffic Act, R.S.O. 1990, c. H.8)

In order for these exemptions to be utilised, the vehicle must have flashing red/white/blue lights and siren activated simultaneously, and it must be a true emergency. Emergency vehicle drivers must operate the emergency vehicle with due regard for the safety of others, on and off the road (Krkachovski, 2008). Emergency vehicles are also granted certain additional privileges under the HTA, such as the ability to drive on closed highways.

### *Materials – driving simulation*

The simulated driving scenario was conducted using a PatrolSim ambulance driving simulator [Version 4, L3 Training Solutions, Salt Lake City, UT] based at [redacted for peer review]. This is an open-cabin simulator which simulates driving conditions in both emergency and non-emergency modes, visually and aurally (see Figure 1). It does not have the ability to simulate motion. While the evidence related to validity of driving simulators is mixed (Mullen 2011, Wynne 2019), the use of a driving simulator in this pilot study was designed to minimize ethical concerns and risks related to the operation of real vehicles by participants, especially in the post-stress phase. Driving simulators are a poor choice for the assessment of real world driving (for example as a substitute to road testing), but they are generally considered a valid tool for researching driving. The simulator provides navigation directions on screen using large arrows which denote route of travel similar to that of commonly used global positioning system car navigation units. This simulator is also capable of recording a number of critical driving errors. Participants were initially provided with an orientation and test run in the simulator prior to any data collection (driving or clinical scenario) in order to provide them with the opportunity to understand the simulator functions. Participants were then given a brief overview of the HTA and Ambulance Act to ensure that all participants understood the rules of the road. A baseline driving assessment was then performed whereby each participant drove the simulated ambulance under emergency driving conditions from a known starting position to a denoted endpoint. Pre-programmed, standardised “EMS\_City\_2” and “EMS\_City\_3” routes were used, each consisting of a 2-3

minute drive with a set start and end location. These routes are simulated driving routes, and do not represent a real city driving route that students would be familiar with.

Data were collected using several approaches. First, a computer generated log of driving errors was captured by the PatrolSim software. These errors included: failure to wear a seatbelt (not exempted under HTA); exceeding the posted speed limit (exempted); and collisions. Critical errors not recognized by the driving simulator were recorded by the researchers, and included: failure to stop at a stop sign (exempted with conditions under HTA), running a red light (exempted with conditions), and loss of vehicle control. We define loss of control of the vehicle as “*the act of the driver being unable to successfully maneuver the vehicle, resulting in the simulated vehicle skidding off the road surface and requiring the vehicle to come to a stop to regain control*”. The “baseline” drive and “post-stress” drive were standardized for each participant.

#### *Materials – stress inventory*

Once the participant had completed each drive, they completed a self-reported stress-inventory test. The National Aeronautics and Space Administration Task Load Index (NASA-TLX) is one of the most widely used instruments to assess overall subjective workload, and has previously demonstrated accurate test-retest reliability, validity and sensitivity (Hoonakker et al., 2012), as well as being easy to administer and analyse via an official NASA developed mobile app. The NASA-TLX is a multidimensional instrument comprised of six subscales designed to measure workload; mental demand, physical demand, temporal demand, performance, effort, and frustration (Hart and Staveland, 1988). The NASA-TLX requires participants to weigh and rate these categories on a sliding scale, on a 20-point scale ranging from “Low” to “High”, resulting in a report of the overall workload burden experienced by the participant on a scale from 0 to 100. The participants repeated the test after each drive in the simulator to compare their perceived workload burden between drives.

#### *Materials - clinical simulation*

Participants individually completed a 12-minute stress-inducing clinical simulation which involved the resuscitation of a paediatric patient. This clinical scenario was reviewed by faculty members to ensure clinical accuracy and to predict its ability to induce stress in paramedic students. All participants completed the same clinical scenario. Immediately following the clinical scenario, the individual was required to drive the simulator under emergency driving conditions from another standardised start to end point. They were also required to complete the NASA-TLX for a second time. Participants were given the opportunity to debrief after their participation to address any concerns and were informed of additional support services if required.

#### *Data Analysis*

“Baseline” and “post-stress” driving errors were compared using results from the driving simulator’s computer-generated report of critical errors as well as critical driving errors recorded by two observers. “Baseline” and “post-stress” perceived levels of stress were compared using results from the NASA-TLX. Descriptive statistics are used to illustrate data. We now report on critical driving errors that occurred under emergency driving conditions, namely failure to wear a seatbelt, failure to stop (red light/stop sign at an intersection), and loss of control of vehicle.

## Results

A total of 36 participants completed the study with 29 first year students (81%) and 7 second year (19%). Critical driving errors occurred more often “post-stress” than at baseline. Forgotten seatbelt, failure to stop for red lights or stop signs and loss of control of the vehicle all demonstrated an increase after exposure to stress compared to “baseline” (see Figure 2).

*Figure 2. Critical driving errors at baseline and post-stress*

Participants reported an increased level of stress during the “post-stress” drive (overall weighted stress score of 67.59/100) compared to “baseline” drive (overall weighted stress score of 63.81/100) via the NASA-TLX (Figure 3). When stress scores were broken down into specific categories, it was found that on average participants rated “mental demand” the highest source of stress (73.1/100), followed by “frustration” (64.86/100), “effort” (63.47/100), “temporal (time) demand” (61.39/100), performance demand” (54.58/100), and finally “physical demand” (26.39/100). No participants reported experiencing simulator sickness.

*Figure 3. Mean NASA-TLX reported stress scores baseline and post-stress.*

## Discussion

The results of this pilot study demonstrate that paramedic students make more critical driving errors when stressed, namely failure to wear a seat belt, failure to stop at stop signs or red lights (intersections), and loss of control of the vehicle. They also reported higher levels of stress after a stressful clinical scenario, in particular in the domain of mental demand. These findings are important to reflect on given the potential consequences for both paramedic and patient safety. They suggest that the link between stress and driving performance is worthy of further exploration, and that existing guidance related to driving under emergency conditions may need to be revisited or clarified.

Increased occupational stress and time constraints are regularly encountered by paramedics during transports to the hospital (LeBlanc et al., 2012). The types of errors made after stress exposure suggest that paramedic students may drive in a manner that is less defensive and more unsafe during transport after stressful calls. We discovered that participants were 3.3 times less likely to wear their seatbelt when driving “post-stress”. Failure to wear a seatbelt is inherently dangerous when driving and results in significantly higher mortality rates when compared to collisions where seatbelts were worn (Abbas et al., 2011). Fatal ambulance collisions are also more prevalent when the lights and sirens are activated during emergency driving (Kahn et al., 2001). If paramedics are more likely to not wear seatbelts after stressful calls, this could be a contributing factor to fatalities associated with lights and sirens collisions.

Failure to stop at stop signs or red lights before exercising exemption and proceeding through them under emergency driving conditions increased post-stress, resulting in increased risk for participants and their vehicle occupants. This is one of the leading causes of ambulance accidents in the United States of America (Retting et al., 2003). Injuries are more likely in collisions involving missed stop signs or red lights than in other crash types; injuries were reported in 45% of red light crashes compared to 30% in other types of crashes (Retting et al., 2003). Researchers in Alberta, Canada also found that failure to stop at stop signs and red lights led to more injuries during accidents involving an emergency vehicle (Yasmin et al.,



2014). In addition, most fatal ambulance crashes in the United States occur while going through an intersection with the emergency lighting and sirens activated (Kahn et al., 2001). This suggests that activation of lights and sirens may not be sufficient to prevent collisions at intersections; emergency vehicle operators are generally advised to come to a complete stop at stop signs and red lights under emergency driving conditions before exercising exemptions under legislation, in order to reduce these types of collisions (Krkachovski, 2008). In addition, the provision of advanced driver training may mitigate some of these forms of collisions through earlier recognition and anticipation of potential issues.

Participants also reported increased mental demand during the simulated drives. A possible cause for the rise in the specific critical errors reported in this study is cognitive overload from the stressful stimuli that were induced. We are all constantly overloaded with perceptual information in our daily lives and activities. Our ability to process this information is limited, and under stressful conditions, the cognitive system becomes overloaded, decreasing resources devoted to attention, and therefore our ability to concentrate and perform a specific task (LeBlanc, 2009). This increased mental demand may potentially contribute to risky decision making or lack of awareness when operating an ambulance under emergency driving conditions.

Though not studied directly within our study, our preliminary work focused on gathering the data and identifying the literature to support the rationale for our study highlighted some significant issues which we have discussed elsewhere (redacted for peer-review). In particular, the lack of easily accessible statistics on the incidence of emergency vehicle and ambulance collisions. The lack of a national reporting database makes it difficult for researchers and policymakers to base recommendations on appropriate evidence. It also leads to a lack of standardization - the definition of collision in the various sources we identified is often ambiguous, undefined or conflicts with a definition used elsewhere. This lack of standardization poses a challenge when attempts are made to quantify the scale of the issue. Future endeavours to implement national, standardized reporting measures should remain aware of this issue.

### *Limitations*

Our small sample size resulted in our results being prone to error in statistical analysis, and thus we elected to discuss our results in terms of descriptive statistics only. The results may not accurately reflect driving abilities of all paramedic students in the program, and this reduces the external validity of the results. However, the findings of this pilot study are designed to stimulate discussion and provide a foundation for future, more robust research on the issue. The majority of participants were first year paramedic students with limited ambulance operations experience. Although the driving simulator is able to recreate the visual and auditory aspects of driving quite accurately, it is unable to recreate the physical forces (g-forces) and sensations of acceleration, deceleration, and turning. Participants reported this made it difficult to judge their speed, how hard they were braking, and how aggressive they were steering in the simulator. The results from this study cannot be directly translated to the driving of real vehicles – however, the underlying suggestion that stress appears to affect driving performance is worthy of further investigation, and to date has not been investigated in paramedics. The conduct of this study with real emergency vehicles however would be fraught with issues surrounding ethical conduct and participant safety.

### *Future research*

Future studies in this area would benefit from studying a larger population of clinically active paramedics, as well as paramedic students and recent graduates. This may yield results that are more applicable to the population who are potentially affected by the issues highlighted in our results. Future research could also incorporate more objective physiological markers of stress in addition to subjective self-reported stress approaches.

## Conclusion

Paramedics are subjected to stressful situations on a regular basis in their careers, which may affect both their ability to perform medical tasks and drive safely. Our results demonstrate that paramedic students reported higher levels of stress after a stressful simulated clinical scenario. In a simulated driving environment they made more critical driving errors after a stressful simulated clinical scenario than before. These critical errors are contributory factors in many ambulance collisions and crashes. The findings of this study should stimulate increased dialogue on the nature of occupational stress in paramedic practice, and its potential implications for both providers and patients.

## Acknowledgments

The authors wish to thank Ms. Lauran Livingston for her contributions to the conduct of the study. We also wish to thank Mr. Mark Dwyer and Mr. Jason Constable for their assistance with the conduct of the study.

## References

- Abbas, A.K., Hefny, A.F., Abu-Zidan, F.M., 2011. Seatbelts and road traffic collision injuries. *World J. Emerg. Surg.* <https://doi.org/10.1186/1749-7922-6-18>
- BBC, 2014. South Central Ambulance vehicles crash nearly 700 times [WWW Document]. URL <https://www.bbc.com/news/uk-england-28684903> (accessed 6.2.19).
- BBC, 2011. Thousands of 999 vehicle Crashes in Wales Since 2011 [WWW Document]. URL <https://www.bbc.com/news/uk-wales-38254464> (accessed 6.2.19).
- Cartwright, S., Cooper, C.L., Barron, A., 1996. The company car driver; occupational stress as a predictor of motor vehicle accident involvement. *Hum. Relations* 49, 195–208. <https://doi.org/10.1177/001872679604900204>
- Cœugnet, S., Miller, H., Anceaux, F., Naveteur, J., 2013. How do time pressured drivers estimate speed and time? *Accid. Anal. Prev.* 55, 211–218. <https://doi.org/10.1016/j.aap.2013.02.040>

- Hart, S.G., Staveland, L.E., 1988. Development of NASA-TLX (Task Load Index): Results of Empirical and Theoretical Research. *Adv. Psychol.*  
[https://doi.org/10.1016/S0166-4115\(08\)62386-9](https://doi.org/10.1016/S0166-4115(08)62386-9)
- Hoonakker P, Carayon P, Gurses AP, Brown R, Khunlertkit A, McGuire K, et al. Measuring workload of ICU nurses with a questionnaire survey: the NASA Task Load Index (TLX). *IIE Trans Healthc Syst Eng* [Internet]. 2011 Apr;1(2):131–43.
- Kahn, C.A., Pirralo, R.G., Kuhn, E.M., 2001. Characteristics of fatal ambulance crashes in the United States: An 11-year retrospective analysis. *Prehospital Emerg. Care* 5, 261–269. <https://doi.org/10.1080/10903120190939751>
- Krkachovski V. Legal paper: lights and sirens. OGRA’s Milestones [Internet]. 2008 Sep;47–8. Available from:  
[http://mccagueborlack.com/uploads/articles/9/080901\\_om\\_vk\\_lights.pdf?1282571810](http://mccagueborlack.com/uploads/articles/9/080901_om_vk_lights.pdf?1282571810)
- LeBlanc, V.R., 2009. The effects of acute stress on performance: Implications for health professions education. *Acad. Med.*  
<https://doi.org/10.1097/ACM.0b013e3181b37b8f>
- LeBlanc, V.R., MacDonald, R.D., McArthur, B., King, K., Lepine, T., 2005. Paramedic performance in calculating drug dosages following stressful scenarios in a human patient simulator. *Prehospital Emerg. Care* 9, 439–444.  
<https://doi.org/10.1080/10903120500255255>
- LeBlanc, V.R., Regehr, C., Tavares, W., Scott, A.K., MacDonald, R., King, K., 2012. The impact of stress on paramedic performance during simulated critical events. *Prehosp. Disaster Med.* 27, 369–374. <https://doi.org/10.1017/S1049023X12001021>
- Lumb, D., 2015. West Midlands’ 999 vehicles “crash five times daily” [WWW Document]. URL <https://www.bbc.com/news/uk-england-32722306> (accessed 6.2.19).
- Mullen N, Charlton J, Devlin A, Bédard M. Simulator validity: Behaviors observed on the simulator and on the road. In: *Handbook of Driving Simulation for Engineering, Medicine, and Psychology*. 2011.
- Murray, B., Kue, R., 2017. The Use of Emergency Lights and Sirens by Ambulances and Their Effect on Patient Outcomes and Public Safety: A Comprehensive Review of the Literature. *Prehosp. Disaster Med.*  
<https://doi.org/10.1017/S1049023X16001503>
- National Highway Traffic Safety Administration, 2011a. Fatality Analysis Reporting System (FARS) 1992–2010 Final. Washington DC.
- National Highway Traffic Safety Administration, 2011b. 2011 Annual Report File (ARF). Washington, D.C.
- Ontario Ministry of Transport, Highway Traffic Act, R.S.O. 1990, c. H.8. Available from <https://www.ontario.ca/laws/statute/90h08>. Accessed 20.9.19

- Retting, R.A., Weinstein, H.B., Solomon, M.G., 2003. Analysis of motor-vehicle crashes at stop signs in four US cities. *J. Safety Res.* 34, 485–489.
- Rowden, P., Matthews, G., Watson, B., Biggs, H., 2011. The relative impact of work-related stress, life stress and driving environment stress on driving outcomes. *Accid. Anal. Prev.* 43, 1332–1340. <https://doi.org/10.1016/j.aap.2011.02.004>
- Saunders, C.E., 1994. Ambulance Collisions in an Urban Environment. *Prehosp. Disaster Med.* 9, 118–124. <https://doi.org/10.1017/S1049023X00041017>
- Smith, N., 2015. A National Perspective on Ambulance Crashes and Safety. Guidance from the National Highway Traffic Safety Administration on ambulance safety for patients and providers. *EMS World* 44, 91–92,94.
- Tyakoff, A., Garis, L., Thomas, L., 2014. Emergency Motor Vehicle Crashes in British Columbia: Myth or Reality? Abbotsford.
- Watanabe, B.L., Patterson, G.S., Kempema, J.M., Magallanes, O., Brown, L.H., 2019. Is Use of Warning Lights and Sirens Associated With Increased Risk of Ambulance Crashes? A Contemporary Analysis Using National EMS Information System (NEMSIS) Data. *Ann. Emerg. Med.*  
<https://doi.org/10.1016/j.annemergmed.2018.09.032>
- Whiting, J.D., Dunn, K., March, J.A., Brown, L.H., 1998. EMT knowledge of ambulance traffic laws. *Prehospital Emerg. Care* 2, 136–140.  
<https://doi.org/10.1080/10903129808958858>
- Wynne RA, Beanland V, Salmon PM. Systematic review of driving simulator validation studies. *Saf Sci [Internet]*. 2019 Aug;117:138–51.
- Yasmin, S., Anowar, S., Tay, R., 2014. Injury Risk of Traffic Accidents Involving Emergency Vehicles in Albe, in: Canadian Transportation Research Forum 45th Annual Conference. Toronto.



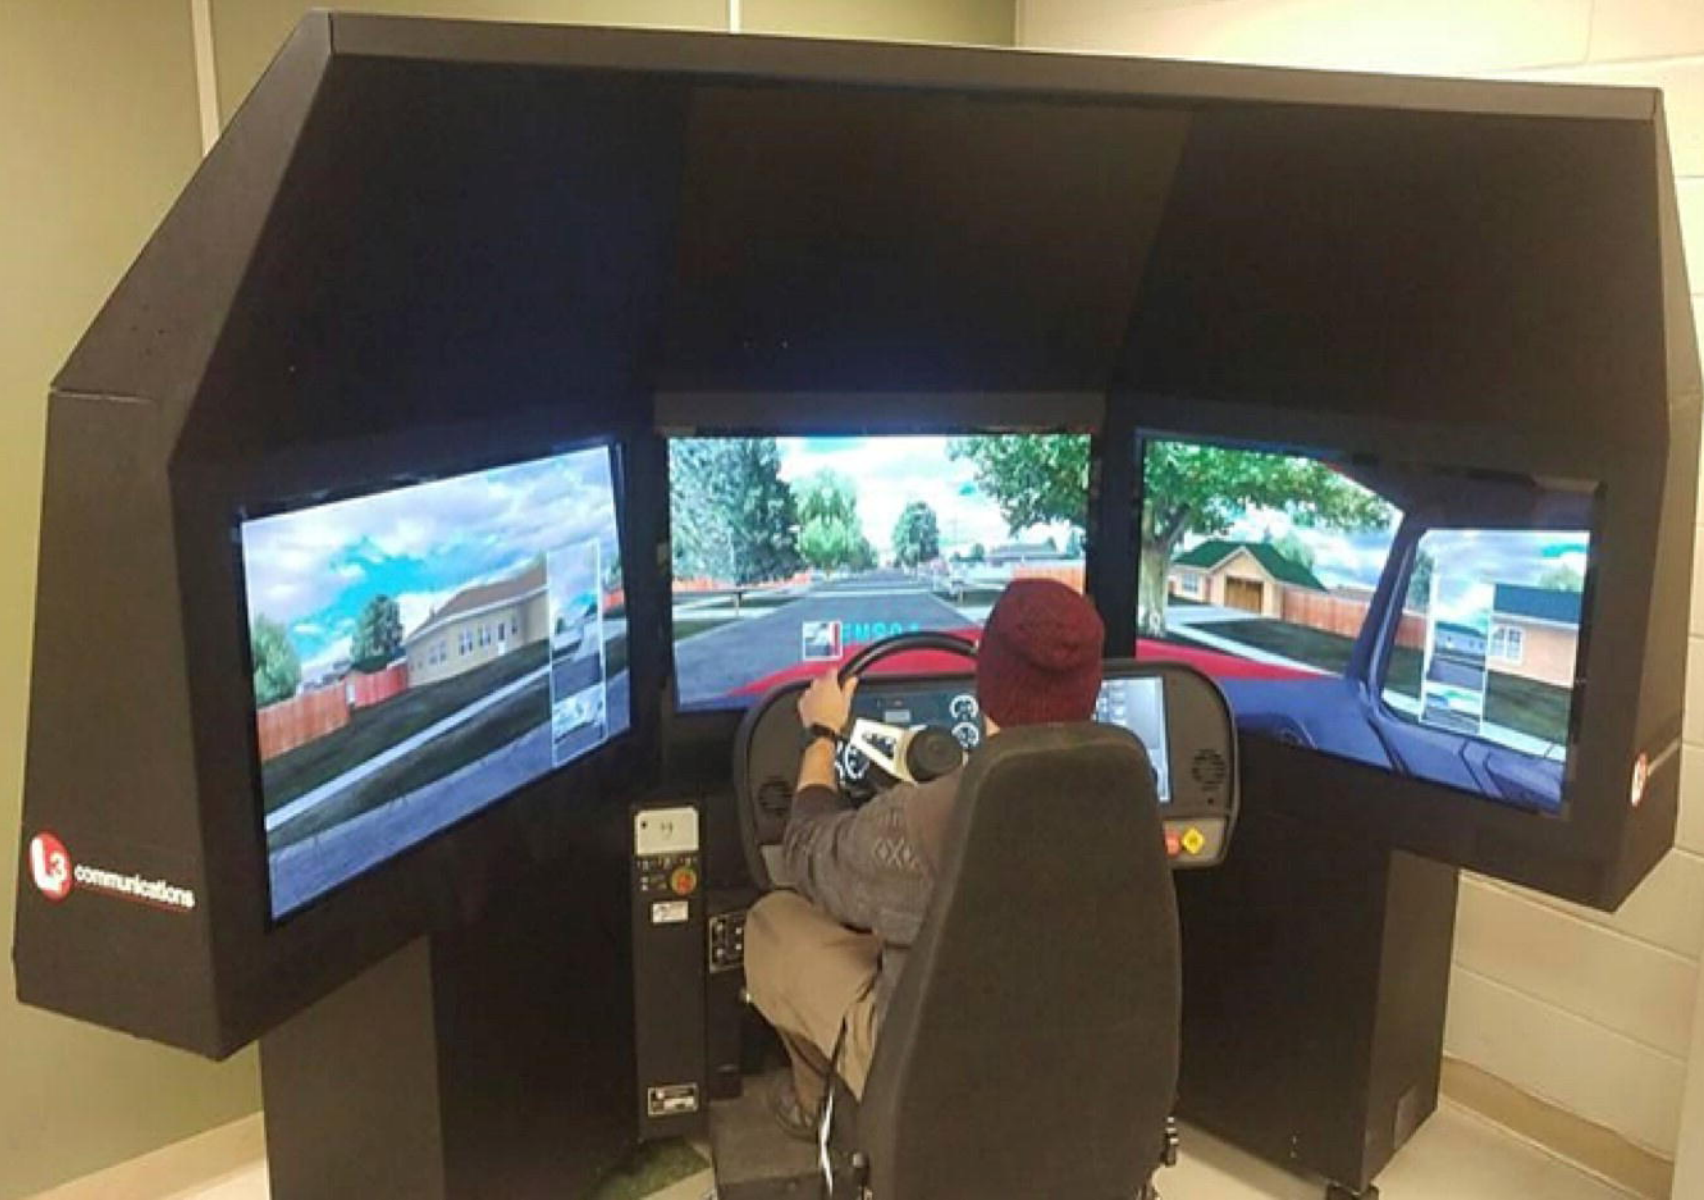

3 communications

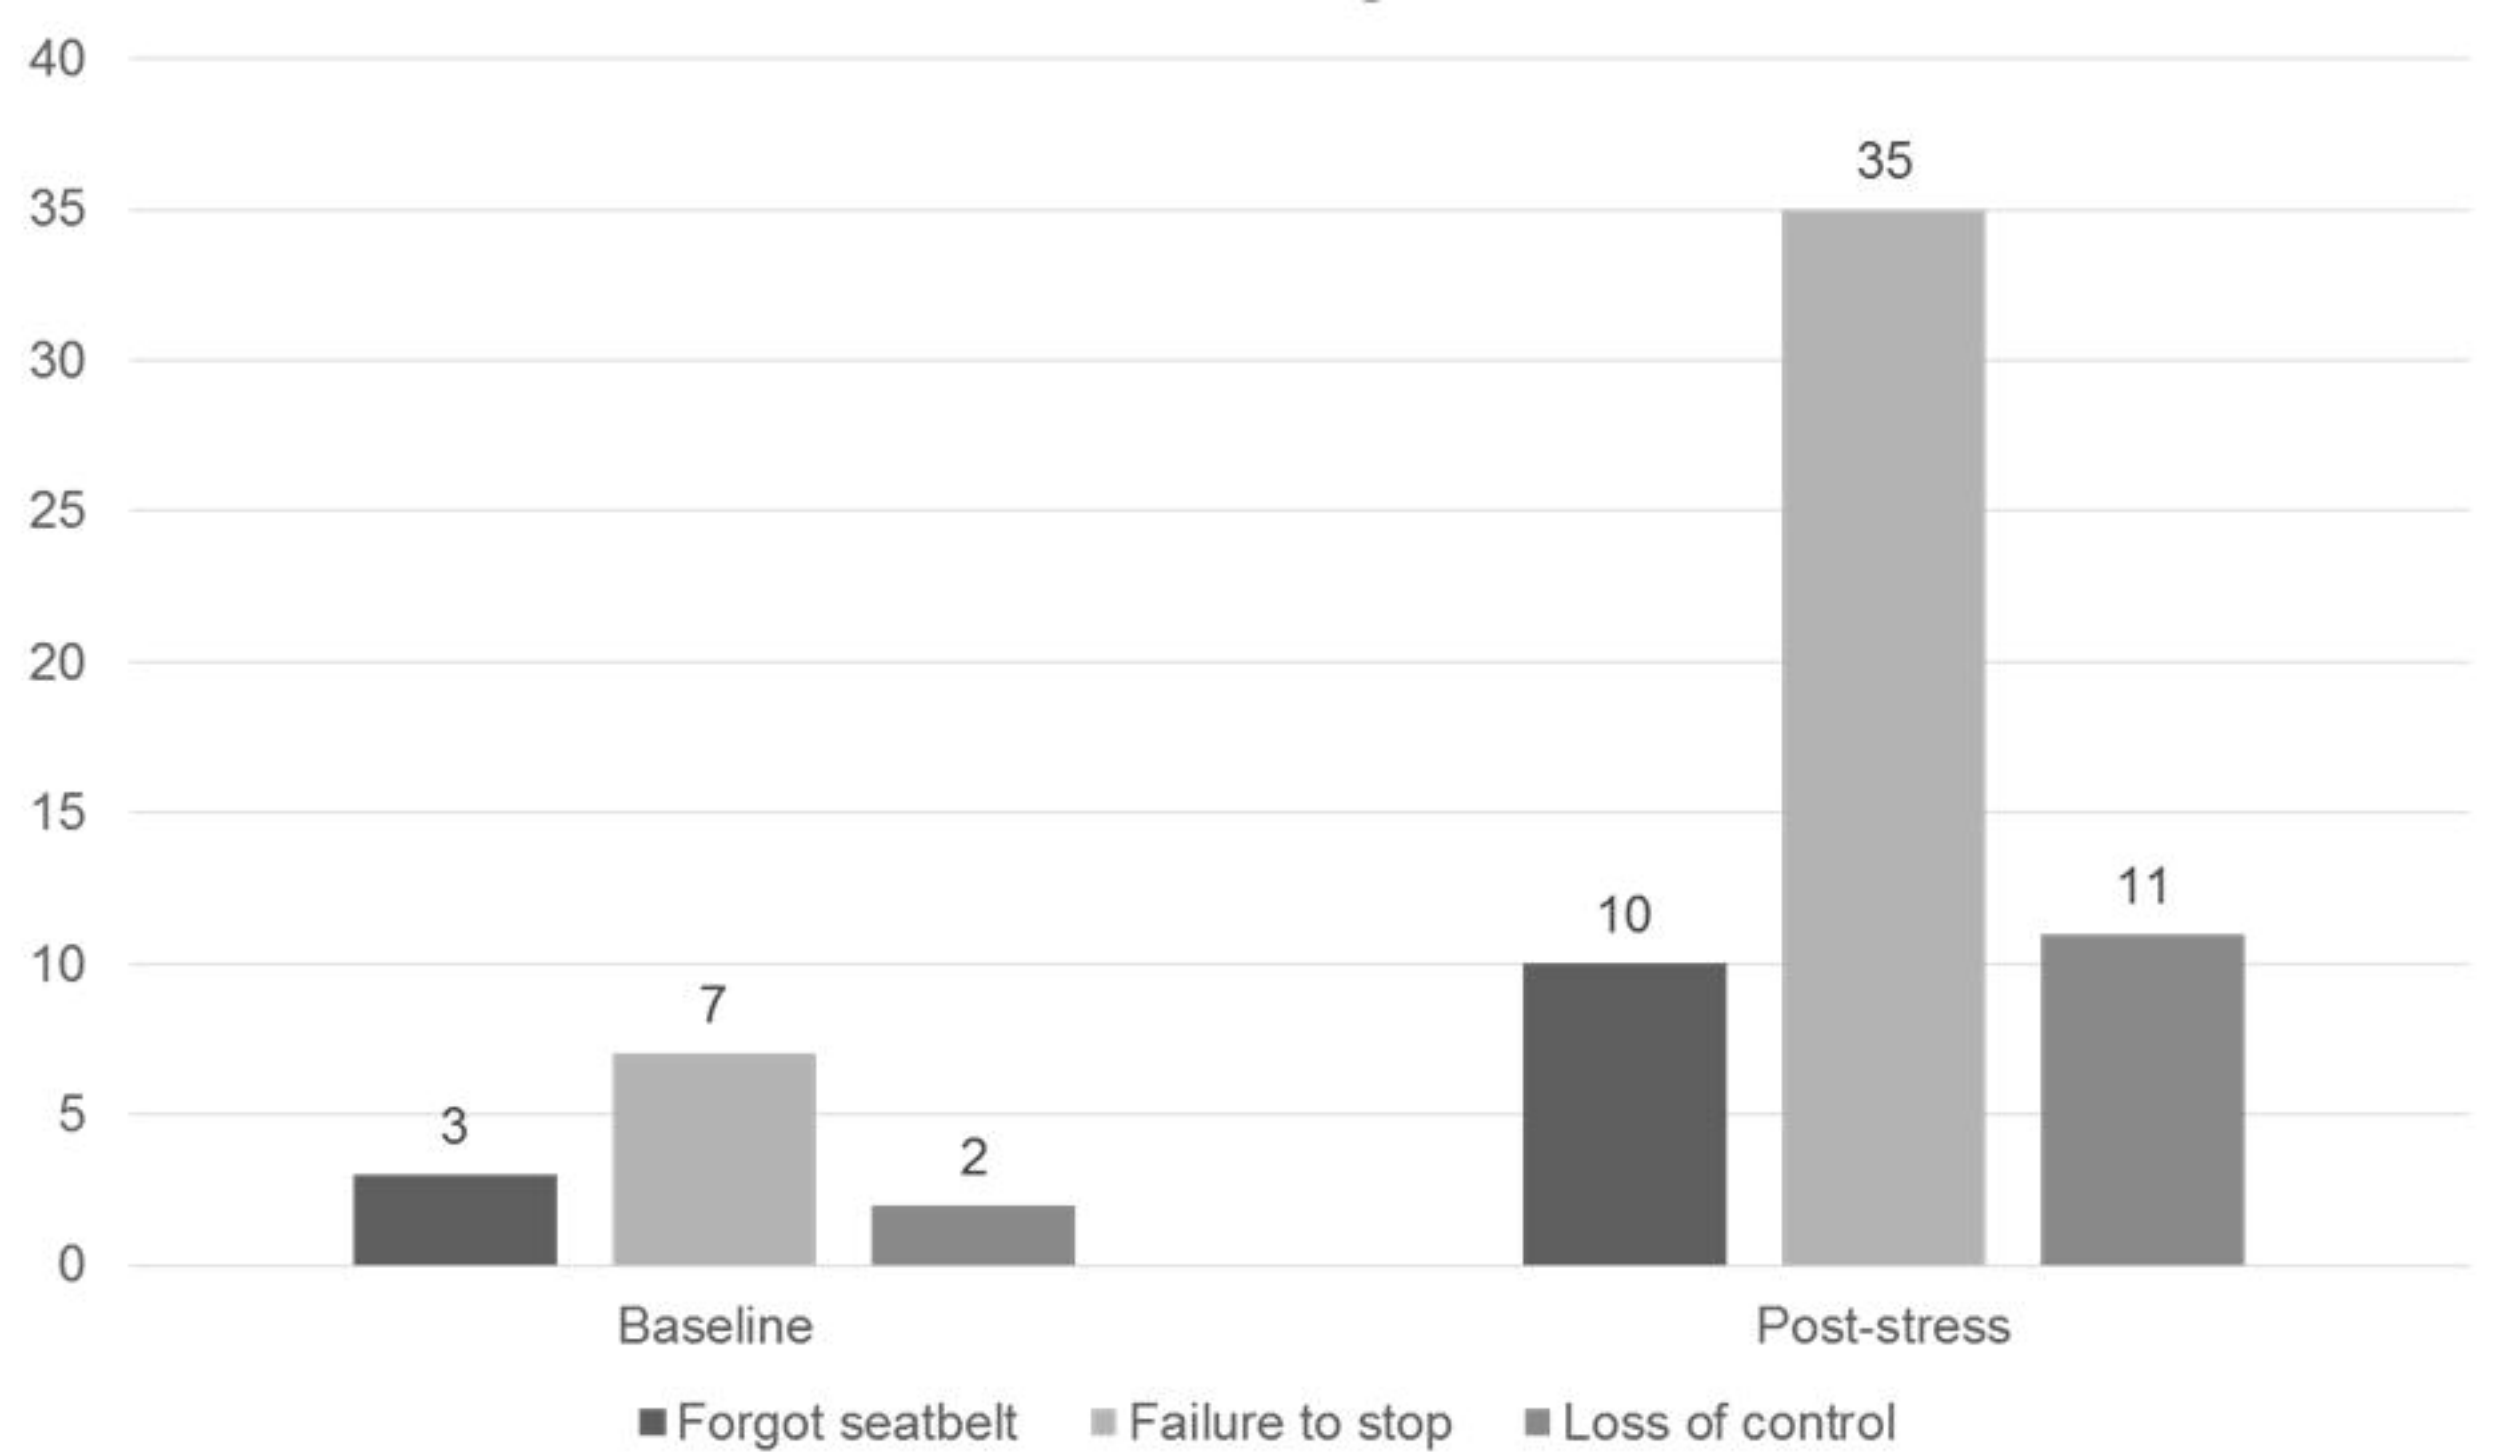

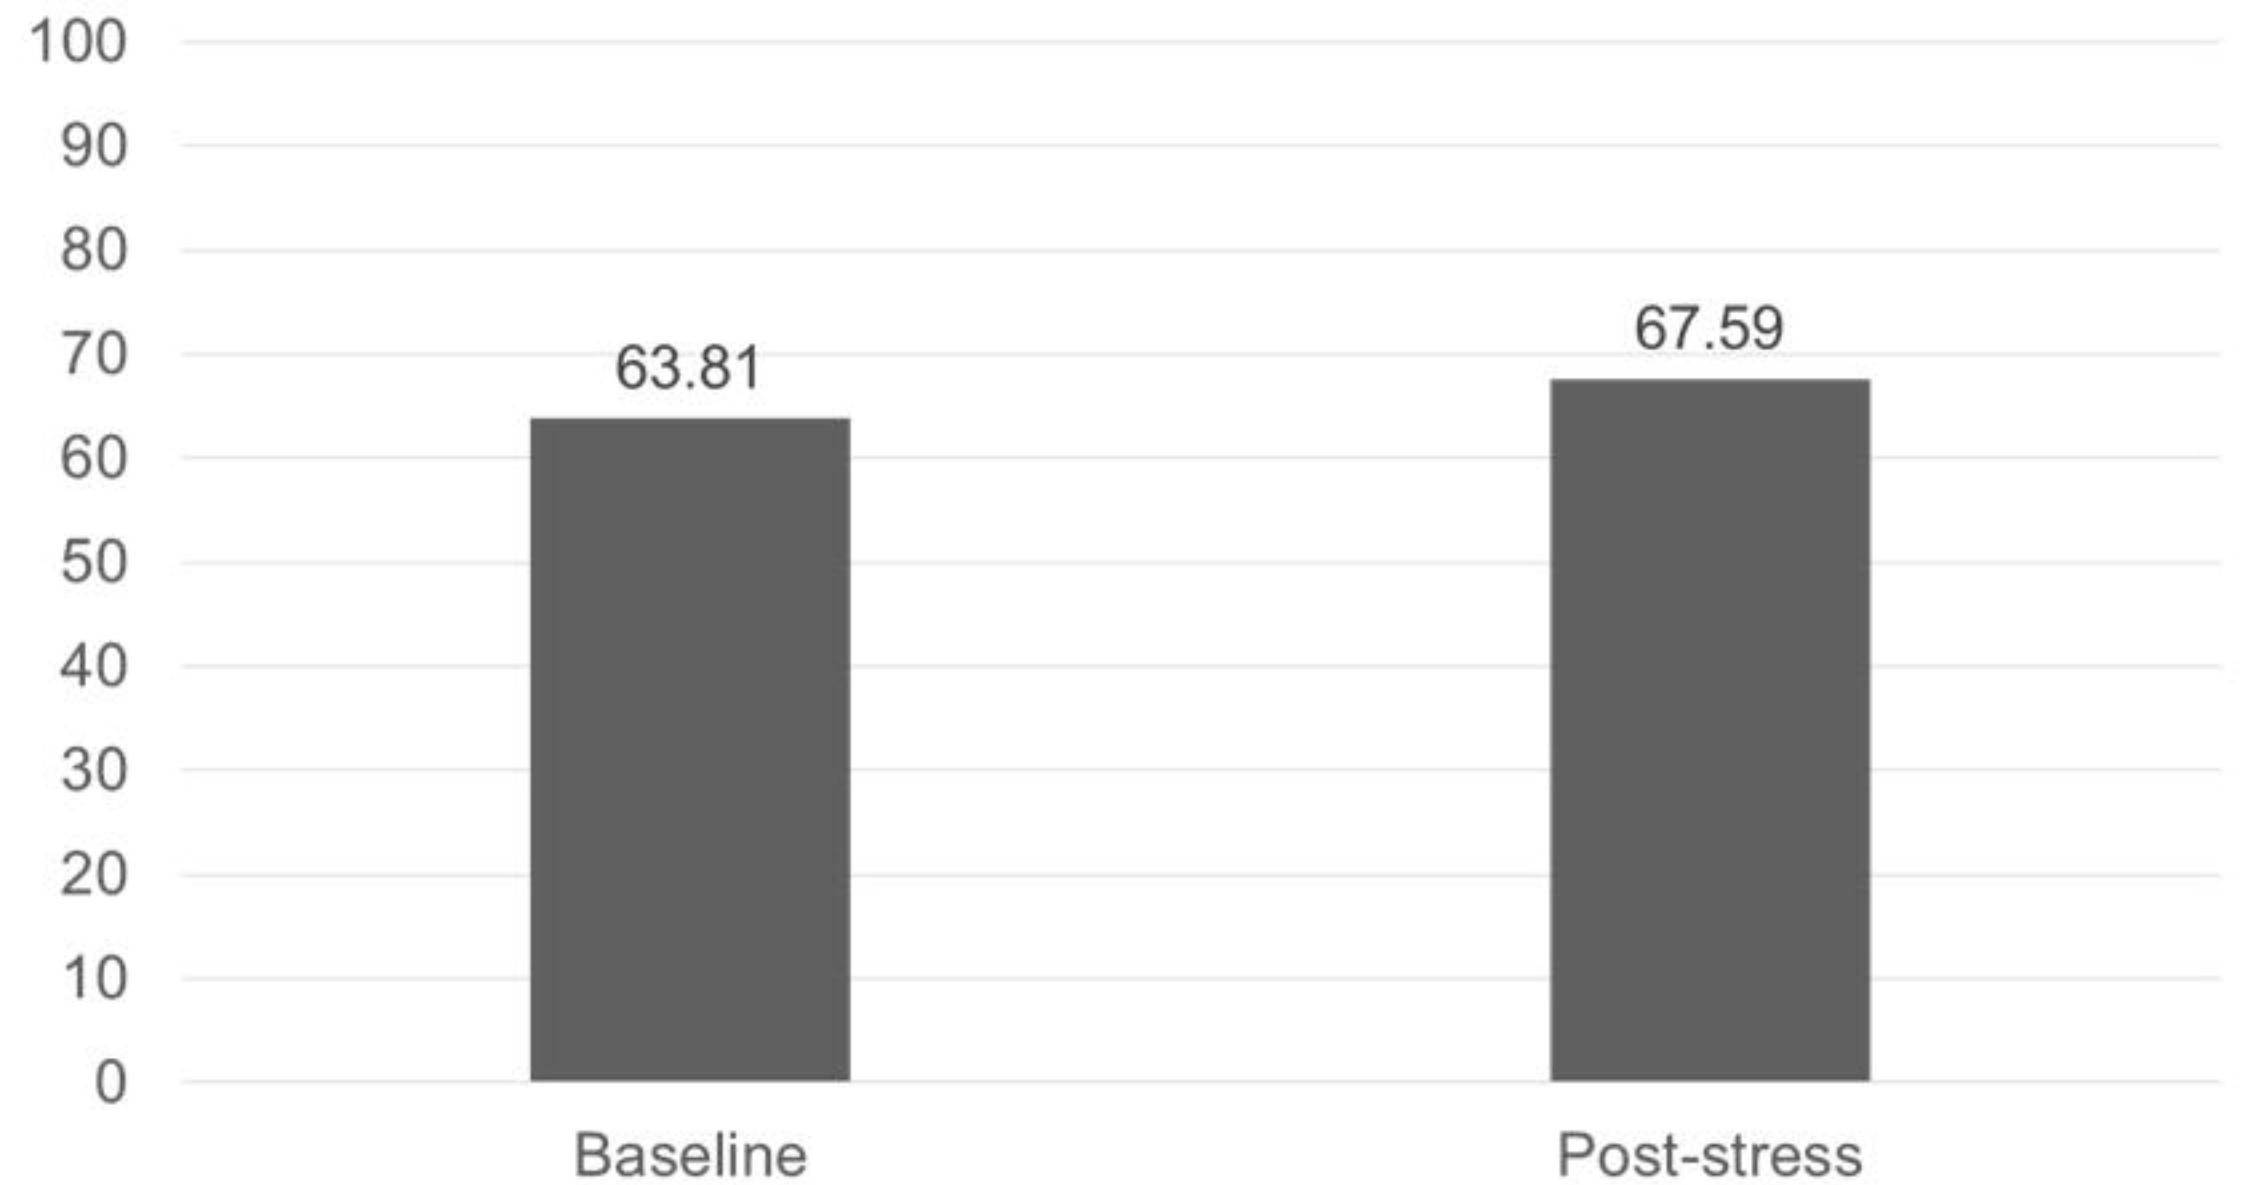

Source: https://medrxiv.org/content/10.1101/19003491v2.full.pdf
